# Supplementary material for: Groundwater connectivity of a sheared gneiss aquifer in the Cauvery River basin, India
Source: Springer Nature journal article supplement (doi:10.1007/s10040-020-02140-y), 2020-04-08
Supplement: MOESM2 [file 17880084]

## Sheet: Paper
Hydrogeology Journal - Electronic Supplementary Material
Groundwater connectivity of a sheared gneiss aquifer in the Cauvery River Basin, India
Sarah Collins1*, Sian Loveless2, Sekhar Muddu3,4, Sriramulu Buvaneshwari3,4, Romesh Palamakumbura1, Maarten Krabbendam1, Dan Lapworth2, Christopher Jackson5, Daren Gooddy2, Siva Naga Venkat Nara3, Somsubhra Chattopadhyay6, Alan M MacDonald1
1 British Geological Survey, The Lyell Centre, Edinburgh, EH14 4AP, United Kingdom. Tel.: +44 131 650 0224 Email: sarcol@bgs.ac.uk
2 British Geological Survey, Maclean Building, Crowmarsh Gifford, Wallingford, OX10 8BB, United Kingdom
3 Department of Civil Engineering, Indian Institute of Science, Bangalore, Karnataka 560012, India
4 Indo-French Cell for Water Sciences, Indian Institute of Science, CNRS, IRD, INRA, UPS, Bangalore, India
5 British Geological Survey, Environmental Science Centre, Keyworth, NG12 5GG, United Kingdom
6 Ashoka Trust for Research in Ecology and the Environment, Bangalore, Karnataka 560064, India
*corresponding author

## Sheet: Data
LIMS Code	Sample Code	Sample type	Sample round	Total depth	Catchment	UTM_Easting	UTM_Northing	Field Temp	Field pH	HCO3-	Conductivity	DO2	TDS	Ca	Mg	Na	K	Cl-	SO42-	NO3-	Ion Balance %	Br-	NO2-	HPO42-	F-	Total P	Total S	Si	SiO2	Ba	Sr	Mn	Total Fe	Oxidised Fe	Li	Be	B	Al	Ti	V	Cr	Co	Ni	Cu	Zn	Ga	As	Se	Rb
								°C		mg/L	mS/cm	mg/L	mg/L	mg/L	mg/L	mg/L	mg/L	mg/L	mg/L	mg/L		mg/L	mg/L	mg/L	mg/L	mg/L	mg/L	mg/L	mg/L	mg/L	mg/L	mg/L	mg/L	mg/L	mg/L	mg/L	mg/L	mg/L	mg/L	mg/L	mg/L	mg/L	mg/L	mg/L	mg/L	mg/L	mg/L	mg/L	mg/L
14137-0050	NB35	BH	2017-10-01	91.4	Berambadi	680080	1304819	27.9	7.06	459.9	1103	6.33	884.431	102	62.73	46.1	6.35	45.3204	39.4245	122.606	<10	0.25659	<0.1	<0.2	1.06384	<0.03	16	46.63	99.7556	65.2	997.8	1.6	<3	<3	23	0.02	78	<3	<0.2	36.4	5.9	0.32	0.7	3	200	<0.03	0.31	1.5	2.66
14137-0051	B32	BH	2017-10-01	71.6	Berambadi	678790	1304732	26.9	7.08	487.9	1279	4.78	944.494	109	62.09	63.7	10.04	60.6023	38.3672	112.794	<10	0.244479	<0.1	<0.2	0.588719	<0.03	19	44.2	94.5571	109.9	1429.2	1.2	6	6	19	<0.01	50	<3	<0.2	15.8	0.8	0.14	1.2	7	93	<0.03	0.22	1.2	13.6
14137-0052	B30	BH	2017-10-01	85.3	Berambadi	678381	1303753	27.6	7.04	572.93	2887	4.37	1561.83	316	101.69	124	49.55	372.223	152.09	446.274	0.932331	<1	1.33039	<1	<0.5	0.19	63	38.94	83.3043	410.3	2146.2	3	7	7	9	<0.01	115	<3	<0.2	14.3	2.3	0.51	1.5	7	54	<0.03	0.64	2.9	2.27
14137-0053	B58	BH	2017-10-01	61	Berambadi	677046	1302996	30.2	7.06	603.405	1122	6.44	472.553	65	60.81	145.8	13.88	104.127	66.9507	15.9853	1.68009	<1	<0.5	<1	<0.5	<0.03	31	21.83	46.7009	55.2	1078.3	21.8	17	17	18	<0.01	142	7	0.2	5.8	<0.2	0.5	6.9	5	231	<0.03	0.2	5.3	30.3
14137-0054	NB105	BH	2017-10-01	61	Berambadi	676615	1302962		6.85	345.5	1161	6.19	856.346	93	52.64	61.7	9.95	70.283	44.6902	178.583	<10	<0.5	<0.25	<0.5	0.404697	<0.03	19	34.22	73.2068	16	1059.6	0.8	<3	<3	11	<0.01	62	5	<0.2	7.3	<0.2	0.07	<0.3	2	97	<0.03	0.14	2.3	2.21
14137-0055	NB86	BH	2017-10-01	70.1	Berambadi	674759	1302756	27.4	7.03	323.5	1059	4.43	810.884	81	25.69	102.3	4.85	76.8208	53.1471	143.576	<10	<0.5	<0.25	<0.5	<0.25	<0.03	22	37.12	79.4108	34.7	535.4	1	5	5	13	<0.01	62	3	<0.2	16.8	<0.2	0.1	<0.3	2	70	<0.03	0.11	1.5	1.92
14137-0056	NB101	BH	2017-10-01	152.4	Berambadi	675814	1302737	27.9	6.99	446.5	1052	4.09	846.554	88	42.87	83.1	6.8	57.1958	27.9151	94.1726	<10	<1	<0.5	<1	<0.5	<0.03	15	37.39	79.9884	69.8	1015.4	0.6	11	11	9	<0.01	104	<3	<0.2	13.4	0.4	0.13	0.4	2	88	<0.03	0.22	3.6	4.1
14137-0057	B113	BH	2017-10-01	82.3	Berambadi	673204	1302631	27	6.87	421.5	1808	2.32	1279.82	160	67.27	120.7	10.14	213.896	95.4728	190.844	<10	0.581593	<0.25	<0.5	0.573883	<0.03	39	25.72	55.0228	85.4	1370.7	3.2	9	9	37	0.07	65	5	0.6	4.6	1	0.14	1.8	4	434	<0.03	0.12	8.4	15.71
14137-0058	NB121	BH	2017-10-01	48.8	Berambadi	672671	1301154	25.8	7.07	887	1440	N/A	1315.93	53	69.66	203.6	2.92	46.3512	12.9657	40.429	<10	<0.5	<0.25	<0.5	0.402648	<0.03	7	32.08	68.6287	35.2	817.8	1	4	4	7	<0.01	326	<3	<0.2	16.3	0.3	0.06	<0.3	6	51	<0.03	0.06	2.7	0.32
14137-0059	B156	BH	2017-10-01	97.5	Berambadi	671337	1300523	25.9	7.03	507.104	1413	N/A	550.027	146	75.86	43.3	4.21	133.593	44.2326	102.832	2.94218	<0.5	<0.25	<0.5	<0.25	<0.03	19	31.29	66.9387	98.5	1182.3	0.8	3	3	5	<0.01	103	<3	<0.2	12.9	0.2	0.12	0.5	2	206	<0.03	0.12	1.1	0.21
14137-0060	B148	BH	2017-10-01	73.2	Berambadi	671111	1300427	27.1	6.97	454.6	1174	5.37	904.965	161	39.14	31.7	10.14	96.3241	52.897	59.1637	<10	<0.5	<0.25	<0.5	<0.25	<0.03	23	27.02	57.8039	225.4	1200.8	0.8	7	7	3	<0.01	74	<3	<0.2	7.9	0.5	0.09	1.3	3	68	<0.03	0.07	1.9	0.3
14137-0061	B188	BH	2017-10-01	83.8	Berambadi	670882	1302007		6.7	631.7	1514	1.84	1170.57	123	57.34	126.5	6.26	140.369	56.8769	28.5247	<10	0.548253	<0.25	<0.5	<0.25	<0.03	25	25.22	53.9531	96.2	1456.7	1.7	32	32	9	<0.01	79	26	0.9	8.6	0.2	0.12	0.6	<1	70	<0.03	0.13	7.7	11.7
14137-0062	B152	BH	2017-10-01	48.8	Berambadi	671231	1302509	26.3	6.83	497.5	1699	1.84	1213.16	169	78.85	68	5.98	220.014	59.5139	114.303	<10	<1	<0.5	<1	<0.5	<0.03	26	30.67	65.6123	184.1	1820.1	2.6	13	13	15	<0.01	70	6	0.3	10.9	20.8	0.14	0.8	16	59	<0.03	0.21	1.4	1.03
14137-0063	B126	BH	2017-10-01	76.2	Berambadi	672948	1300579	26.4	7.13	521.488	1154	N/A	385.737	97	76.42	34.5	1.66	59.0644	19.9392	97.1534	2.02265	<0.5	<0.25	<0.5	<0.25	<0.03	10	32.47	69.4631	81.1	971.7	6.1	63	63	2	<0.01	69	4	<0.2	8.6	0.5	0.07	0.7	16	42	<0.03	0.05	3.2	0.47
14248-0050	B126	BH	2018-04-01	76.2	Berambadi	672948	1300579	27.4	7.14	564.397	1086		424.605	113.4	54.68	29	2.16	59.6017	27.7159	138.047	-8.94983	0.295225	0.100988	0.749054	0.152874	<0.04	11	32.51	69.5486	105.2	797	13.1	165	165	<4	<0.02	55	87	2	8.4	0.7	0.33	1.5	61.6	196	0.06	0.09	2.06	1.03
14248-0051	B148	BH	2018-04-01	73.2	Berambadi	671111	1300427	29.2	6.67	402.27	1201		512.906	167.1	39.64	30.9	5.93	80.6394	128.683	60.0133	2.31475	0.227304	<0.1	0.655958	0.131098	<0.04	48	27.84	59.5581	227.2	1330	7.2	58	58	<4	<0.02	59	14	0.3	6.18	0.4	0.12	0.9	18	251	<0.06	0.1	3.35	0.43
14248-0052	B152	BH	2018-04-01	48.8	Berambadi	671231	1302509	26.7	6.61	579.025	1639		652.136	162.6	74.24	60.8	5.64	203.805	57.6774	87.3736	-2.31572	<0.5	<0.25	0.954293	<0.25	<0.04	25	31.54	67.4735	192.1	1875	2.4	15	15	16	<0.02	64	12	0.4	12.1	0.7	0.14	0.7	7.3	72	<0.06	0.17	1.03	0.63
14248-0053	B113	BH	2018-04-01	82.3	Berambadi	673204	1302631	36.7	6.98	491.257	1357		539.125	104.5	50.97	97.3	8.25	144.169	65.2608	68.6751	-2.53379	0.433739	<0.1	0.333761	0.248661	<0.04	26	19.68	42.1014	29.6	1201	8.7	11	11	53	0.05	72	8	0.4	1.07	<0.2	0.09	0.7	3.6	159	<0.06	0.08	10.22	20.3
14248-0054	B30	BH	2018-04-01	85.3	Berambadi	678381	1303753	30.3	6.65	492.476	2783		1418.33	243.7	95.96	135.5	37.41	343.155	141.542	421.061	-0.977241	0.839726	<0.25	1.269	<0.25	0.09	57	35.33	75.5815	90.2	3575	2.9	15	15	19	<0.02	103	9	<0.3	9.67	1.3	0.34	1	6.2	128	<0.06	0.35	4.2	21.36
14248-0055	NB121	BH	2018-04-01	48.8	Berambadi	672671	1301154	26.7	7.08	861.4	1402		1285.19	52.9	62.23	195.8	2.94	53.2131	15.1288	41.5778	-5.16955	0.307951	<0.1	0.244383	0.359699	<0.04	7	31.97	68.3934	33	806	1	7	7	7	<0.02	287	7	<0.3	16.58	0.3	0.04	0.3	3.2	13	<0.06	0.14	2.86	0.4
14248-0056	B188	BH	2018-04-01	83.8	Berambadi	670882	1302007	27.3	6.94	561.959	1396		516.959	113.2	53.08	108.6	7.98	139.778	82.1265	12.1951	-0.303221	0.660835	<0.1	0.281292	0.147855	<0.04	32	21.35	45.6741	111.6	1816	52.1	21	21	13	<0.02	62	12	0.5	7.16	<0.2	0.14	3.1	6.8	55	<0.06	0.15	7.65	15.66
14248-0057	NB86	BH	2018-04-01	70.1	Berambadi	674759	1302756	30.8	6.83	496.133	998.7		410.256	76.4	24.76	100.4	5.45	67.9117	53.3789	81.9555	-9.29304	0.307083	<0.05	0.106875	0.210964	<0.04	20	35.95	76.9078	32.2	554	2.3	8	8	16	<0.02	59	4	<0.3	16.37	<0.2	0.1	0.6	3.1	84	<0.06	0.16	1.61	5.55
14248-0058	NB101	BH	2018-04-01	152.4	Berambadi	675814	1302737	31.2	7.15	514.418	459.7		327.315	61.5	36.05	83.6	7.1	40.9495	26.9234	71.1916	-6.81449	0.225292	<0.05	0.135961	0.383607	<0.04	9	32.04	68.5432	8.3	915	1.4	6	6	12	<0.02	87	4	<0.3	7.98	<0.2	0.07	0.3	10	155	<0.06	0.1	6.22	4.92
14248-0060	B32	BH	2018-04-01	71.6	Berambadi	678790	1304732	29.8	6.71	511.98	925.5		313.73	85.6	41.37	47.5	8.61	30.2669	32.382	68.0008	-5.01989	0.149561	<0.05	0.166658	0.474381	<0.04	12	42.91	91.7974	82.6	1066	29.9	10	10	15	<0.02	41	10	0.3	15.8	0.9	0.31	1.2	5.6	83	<0.06	0.23	0.79	9.62
14248-0061	NB35	BH	2018-04-01	91.4	Berambadi	680080	1304819	28.5	6.75	451	1156		459.363	107.8	53.45	57.4	6.8	40.5623	53.0726	140.278	2.23813	<0.2	<0.1	0.241534	0.410931	<0.04	20	46.03	98.472	59.9	1016	3.5	6	6	27	<0.02	58	6	<0.3	35.52	3.3	0.2	0.5	2.2	82	<0.06	0.14	2.99	2.07
14248-0062	B156	BH	2018-04-01	97.5	Berambadi	671337	1300523	26.7	7.1	572.93	1403		552.261	142.3	69.95	44	4.16	139.837	48.7955	103.218	-3.63856	0.439578	<0.1	<0.2	0.211042	<0.04	19	31.79	68.0083	95.8	1170	1.6	9	9	6	<0.02	90	7	<0.3	13.33	0.2	0.12	0.5	2.4	155	<0.06	0.09	1.08	0.32
14248-0063	NB105	BH	2018-04-01	61	Berambadi	676615	1302962	27.6	7.01	380.328	1129		496.653	94.3	48.24	56.9	9.81	64.3472	48.1219	174.934	-1.99462	0.291157	<0.1	0.255882	0.226731	<0.04	18	36.64	78.384	17.1	1088	1	5	5	10	<0.02	56	4	<0.3	8.24	<0.2	0.08	0.2	2.1	93	<0.06	0.15	2.28	1.77
UPSCAPE	Forest S-1	Rain
UPSCAPE	Forest S-2	Rain
UPSCAPE	Hotel S-1	Rain
UPSCAPE	Hotel S-2	Rain
UPSCAPE	Farm S-1	Rain
UPSCAPE	Farm S-1	Rain
UPSCAPE	Forest S-3	Rain
UPSCAPE	Forest S-4	Rain
UPSCAPE	Hotel S-3	Rain
UPSCAPE	Hotel S-4	Rain
UPSCAPE	Farm S-3	Rain
UPSCAPE	Farm S-4	Rain
G.Penny Data	Ekasipura	Rain
G.Penny Data	Ekasipura	Rain
G.Penny Data	Ekasipura	Rain
G.Penny Data	Ekasipura	Rain
G.Penny Data	Ekasipura	Rain
G.Penny Data	Ekasipura	Rain
G.Penny Data	Ekasipura	Rain
G.Penny Data	Ekasipura	Rain
G.Penny Data	SM_Golahalli	Rain
G.Penny Data	Ekasipura	Rain
G.Penny Data	SM_Golahalli	Rain
G.Penny Data	Ekasipura	Rain
G.Penny Data	Ekasipura	Rain
G.Penny Data	SM_Golahalli	Rain
G.Penny Data	Ekasipura	Rain
G.Penny Data	SM_Golahalli	Rain
G.Penny Data	SM_Golahalli	Rain
G.Penny Data	Euc_TDRs	Rain
G.Penny Data	Euc_TDRs	Rain
G.Penny Data	Ekasipura	Rain
G.Penny Data	Ekasipura	Rain
G.Penny Data	Ekasipura	Rain
G.Penny Data	Ekasipura	Rain
G.Penny Data	Ekasipura	Rain
G.Penny Data	Ekasipura	Rain
G.Penny Data	Ekasipura	Rain
G.Penny Data	Ekasipura	Rain
G.Penny Data	SM_Golahalli	Rain
G.Penny Data	Ekasipura	Rain
G.Penny Data	SM_Golahalli	Rain
G.Penny Data	Ekasipura	Rain
G.Penny Data	Ekasipura	Rain
G.Penny Data	SM_Golahalli	Rain
G.Penny Data	Ekasipura	Rain
G.Penny Data	SM_Golahalli	Rain
G.Penny Data	SM_Golahalli	Rain
G.Penny Data	Euc_TDRs	Rain
G.Penny Data	Euc_TDRs	Rain
G.Penny Data	Ekasipura	Rain
G.Penny Data	Ekasipura	Rain
G.Penny Data	Ekasipura	Rain
G.Penny Data	Ekasipura	Rain
G.Penny Data	Ekasipura	Rain
G.Penny Data	Ekasipura	Rain
G.Penny Data	Ekasipura	Rain
G.Penny Data	Ekasipura	Rain
G.Penny Data	Ekasipura	Rain
G.Penny Data	SM_Golahalli	Rain
[truncated: 37 more columns]
